# Supplementary material
Source: publisher site journal article supplement (https://www.spandidos-publications.com/5404/downloadSupplementary)

Figure S1. (A) Flow cytometry plot of apoptosis induced by sorafenib in ACHN cells after silencing of COX-2 expression. (B) Flow cytometry plot of apoptosis induced by celecoxib and sorafenib alone or in combination in ACHN cells. (C) Flow cytometry plot of apoptosis induced by sorafenib in ACHN cells after the silencing of G3BP1 expression. COX-2, cyclooxygenase-2; G3BP1, Ras GTPase-activating protein-binding protein 1; siRNA, small interfering RNA.

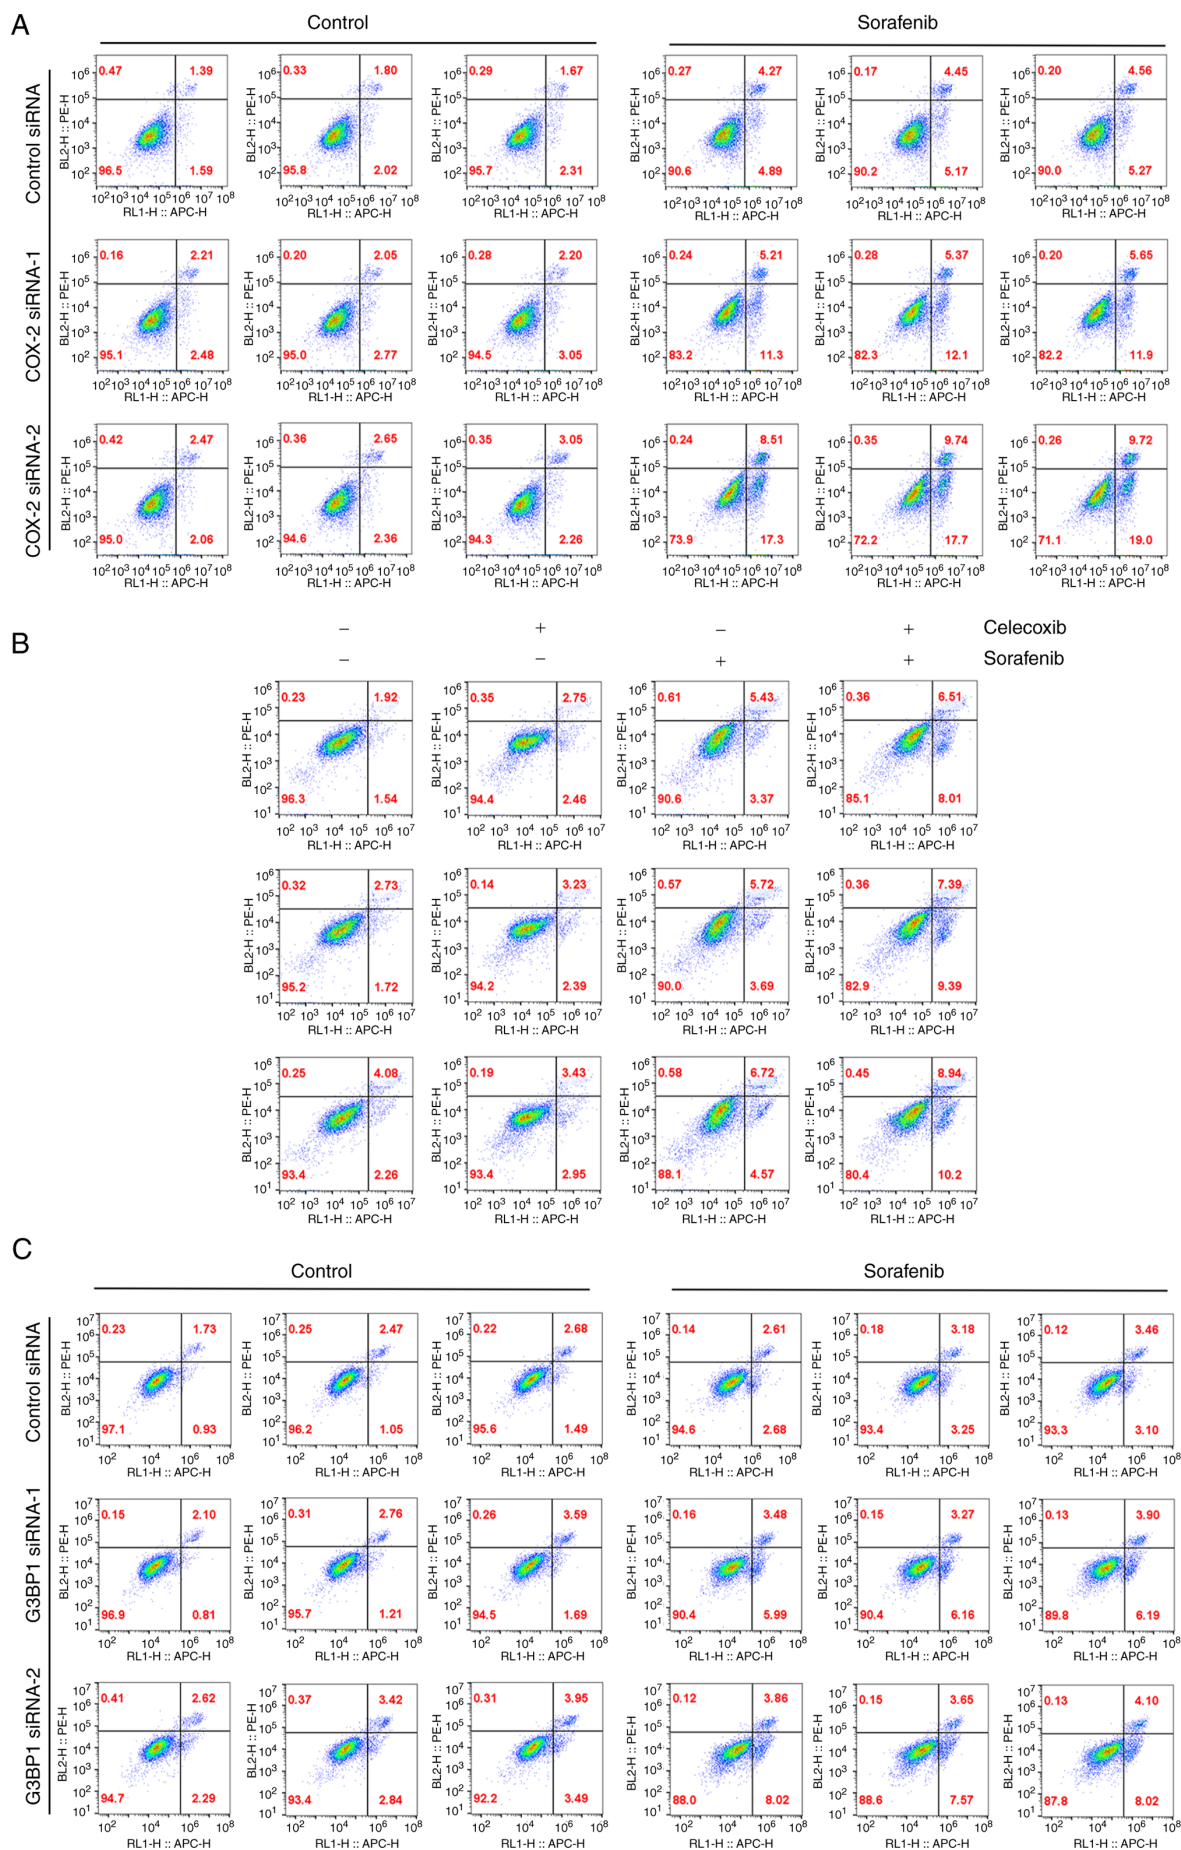

Supplement: Supplementary file 1 [file downloadSupplementary]
